# Supplementary material
Source: Elsevier journal article supplement (https://www.sciencedirect.com/science/article/pii/S0213911110000890)
Supplement: mmc1 [file S0213911110000890:mmc1.pdf]

## Sesión de construcción de modelos de Markov probabilísticos mediante Excel

### Ayuda para completar los ejercicios

Uno de los aspectos más importantes del taller es el énfasis en el trabajo individual basado en los ejercicios. Éstos están diseñados para ilustrar la aplicación práctica de los temas que se comentan en las sesiones teóricas. En el disquete están los ejercicios y las soluciones.

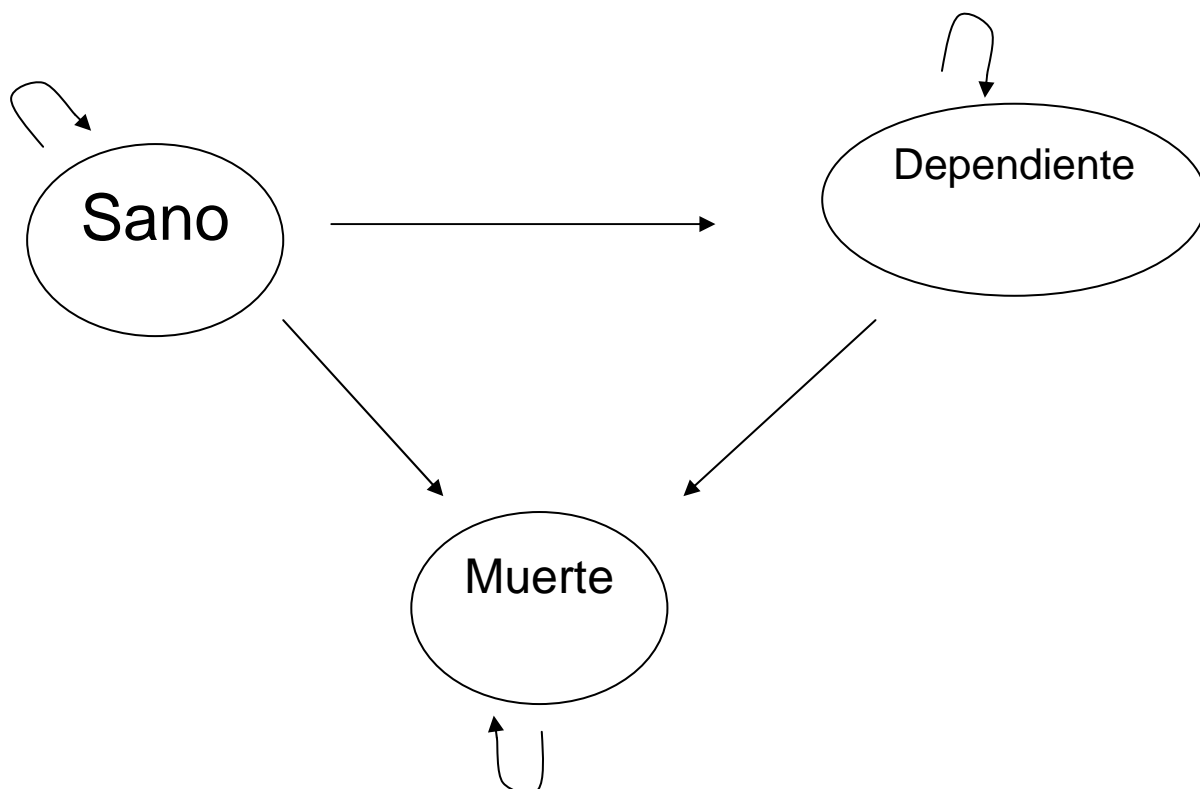

### Ejercicio 1

Construir un modelo de Markov de la enfermedad genérica que permita realizar un análisis de coste-efectividad. Hay que abrir el archivo Enfergenérica CE-Ej1.xls. La estructura del modelo consta de cinco hojas: alternativa 1, alternativa 2, efectividad, coste y sumario.

Por enfermedad genérica entendemos la que tiene una probabilidad de transición a enfermo y a muerto, tal como se ha explicado en la sesión teórica.

Tiene un tratamiento tipo vacuna que se administra en una sola dosis al comienzo del proceso (alternativa 1). Hay un nuevo tratamiento (alternativa 2) que permite mejorar el pronóstico, ya que disminuye el paso a enfermo y a muerte, pero es más caro. La alternativa 1 tiene un coste de 500 € y la alternativa 2 de 2.000 €. El coste de estado es el mismo para el estado dependiente (200 €). La alternativa 2 ahorra porque hay menos enfermos.

El objetivo del ejercicio es realizar un análisis de coste-efectividad con los parámetros que ya están en el modelo: probabilidades de transición, costes, utilidades y descuento.

### *Paso 1*

Calcular la matriz de supervivencia en cada estado en las hojas Alternativa 1 y Alternativa 2. Para ello hay que multiplicar el vector inicial (Rango C14:E14) por la matriz de probabilidades de transición (Rango C4:E6). Se introducen las fórmulas en el rango (C15:E15) para el primer ciclo y se copian a los ciclos siguientes. Atención a las referencias absolutas y relativas (se cambian mediante F4).

### *Paso 2*

Calcular la efectividad. Lo primero que hay que hacer es calcular el descuento para cada ciclo.

$$\text{Valor de 1 año en un ciclo} = 1/(1+\text{descuento})^n \quad n = n^{\circ} \text{ de ciclo.}$$

Luego calculamos la efectividad de cada ciclo multiplicando la supervivencia (hojas Alternativa 1 y Alternativa 2) por la utilidad de ese estado y por el descuento para ese ciclo. Igual que en el paso previo, introducimos las fórmulas en el primer ciclo y luego copiamos a los restantes.

Posteriormente se suma en los rangos C6:E6 y G6:I6 la efectividad de cada alternativa.

### *Paso 3*

Cálculo del coste: se calcula igual que la efectividad. Hay que tener cuidado con los costes de transición, que en este caso sólo ocurren al comienzo del proceso, pues los 10.000 pacientes se tratan cuando aparece la enfermedad; por tanto, no les afecta el descuento. Los costes de estado dependen de que el paciente esté en ese estado, y por consiguiente les afecta el descuento ya que dependen del ciclo.

Hay que introducir también las fórmulas en los rangos (C6:E6) y (G6:I6).

#### *Paso 4*

Ver el resultado en la hoja sumario.

### **Ejercicio 2. Fichero EnfGenericaCEEjercicio2.xls**

Modelo de Markov con probabilidades de transición dependiente del tiempo.

Sigue siendo un modelo determinista, pero las probabilidades de transición dependen de las tasas de mortalidad por todas las causas, de mortalidad por ictus y de dependencia por ictus.

Podemos suponer que es una población hipertensa con un factor de riesgo para ictus, lo que provoca que su riesgo de ictus sea mucho mayor. En función del ictus pueden pasar a un estado dependiente. El modelo es similar al del ejercicio 1. La diferencia es que hay que introducir probabilidades más complejas, que dependen del tiempo y del sexo. Además, los costes del tratamiento son de estado para la población sana (Ctto1 y Ctto2).

Es bueno asignar nombres a los parámetros y utilizarlos en las fórmulas para saber lo que tenemos en cada fórmula. Se asignan mediante insertar, nombre y definir (un solo nombre) o crear (varios nombres a la vez).

El modelo tiene una nueva hoja que se llama Tablas. En ella están las tasas de hombres y mujeres por edad (año). Las tasas que aparecen son las de mortalidad por todas las causas, las de ictus mortales y las de ictus no mortales (dependencia).

En este ejercicio hay que introducir las fórmulas en la matriz de supervivencia por ciclo. La diferencia es que la probabilidad de dependencia se basa en la tasa según la edad y el sexo multiplicado por el RR. En la matriz de probabilidades de transición está la fórmula para facilitar el trabajo. La fórmula de la probabilidad (P) en relación con la tasa (t) y el RR es:

$$P=1-e^{-t*RR}$$

En Excel, la función EXP es e. La función de Excel que se usa para localizar la tasa correspondiente a cada edad es BUSCARV (Valor buscado, matriz datos, indicador de columna). Como las tasas son distintas por sexo, se ha introducido un parámetro (ajustesexo) que permite que las mismas fórmulas sirvan para ambos sexos. Al cambiar el sexo también cambia el ajustesexo. Con BUSCARV localizamos en la tabla las tasas de muerte por todas las causas y las de ictus. La tasa total de esta población es la de la población general más el exceso por el ictus. Tenemos que calcular el exceso para sumarlo a la tasa de mortalidad por todas las causa de la población general. Éste es el motivo de restar 1 al RRictus\_1 y RRictus\_2.

En el sumario se ha incluido una macro para calcular el análisis de sensibilidad por edad.

### **Ejercicio 3. Fichero EnfGenericaCEEjercicio3.xls**

El objetivo de este ejercicio es hacer probabilístico el modelo. Disponemos ya de un modelo determinista con el cual calculamos la razón de coste-efectividad incremental (RCEI) a partir de los valores medios de los parámetros. Analizamos la incertidumbre mediante el análisis de sensibilidad probabilístico.

#### *Paso 1. Introducción de las distribuciones de los parámetros*

Tenemos varios tipos de parámetros: probabilidades, costes, riesgos relativos, edad, sexo y utilidades. En la columna aleatoria se introduce la función de Excel correspondiente a esa distribución. En las columnas adyacentes se introducen los parámetros de la distribución, y en la función se hace referencia

a esas celdas. De este modo sabemos siempre qué parámetros estamos utilizando.

#### Probabilidades desde dependiente

Cuando disponemos de los datos de los pacientes la distribución adecuada es la distribución  $\beta$ . Los parámetros  $\alpha$  y  $\beta$  se calculan a partir de los sucesos y de los fallos. Lo aplicaremos en las Probabilidades de dependiente a muerto. La probabilidad 0,4 se ha obtenido de un estudio observacional con 200 pacientes, de los cuales morían 80 cada año. Se calculan los parámetros  $\alpha$  y  $\beta$ , y se introducen mediante la función (DIST.BETA.INV).

#### Probabilidades desde sano

La probabilidad desde dependiente a sano es 0. La probabilidad de dependiente a dependiente es  $1 - P_{depmue}$ . Las probabilidades de sano a muerto y a dependiente son las mismas que hemos utilizado en el modelo determinista, pero gracias al parámetro RR varían aleatoriamente. En consecuencia, lo que tenemos que introducir como distribuciones son los RR.

#### Riesgos relativos

La probabilidad de dependencia y muerte depende de las tasas respectivas y del RR. Este último varía según una distribución log normal con media  $\ln(X) = 1,793$  y  $EE(\ln x) = 0,143$ . Se introduce con la DISTR.LOG.INV. Se obtiene de estudios observacionales. La probabilidad de sano a sano es la complementaria.

Por otro lado tenemos el beneficio del tratamiento. En un ensayo clínico se compara el tratamiento de la alternativa 2 con el control (tratamiento convencional). Los resultados y el cálculo del RR (*odds ratio*) y su error estándar se muestran en la tabla adjunta. Lo que hay que introducir son los parámetros con la función: DISTR.LOG.INV.

**Tabla**

Cálculo del RR y parámetros de distribución log normal. En este ensayo con población hipertensa se intenta medir el beneficio del tratamiento.

| Ensayo         | Tratamiento |               |      | Control               |   |   |
|----------------|-------------|---------------|------|-----------------------|---|---|
| Ictus          | 60          | 120           | 180  | Ictus                 | a | b |
| Pacientes      | 1560        | 1190          | 2750 | Pacientes             | c | d |
|                | 1620        | 1310          | 2930 |                       |   |   |
| OR             | (a*d)/(b*c) |               |      |                       |   |   |
|                |             | <b>0,381</b>  |      |                       |   |   |
| Ln OR          |             | <b>-0,964</b> |      |                       |   |   |
| SE (Ln OR)     | 0,02648136  | <b>0,163</b>  |      | Raíz(1/a+1/b+1/c+1/d) |   |   |
| IC OR superior | 0,975       | <b>0,525</b>  |      |                       |   |   |
|                | 0,05        |               |      |                       |   |   |
| IC OR inferior | 0,025       | <b>0,277</b>  |      |                       |   |   |
|                | 0,05        |               |      |                       |   |   |

**Costes**

El coste del tratamiento depende del peso del paciente. Con el tratamiento convencional es de 6,5 €/kg y con el alternativo de 65 €/kg de peso. Se utiliza la distribución normal: DISTR.NORMAL.INV.

**Costes de la dependencia**

Se han obtenido de una encuesta con pacientes. La media del LN(X) es 6,936 y la desviación típica (LnX) = 0,643.

## Utilidades

Para el estado sano es 1. Para el estado dependiente se ha hecho una encuesta con Euroquol 5D que ha dado una media de 0,701 y un error estándar de 0,0347. Se utiliza la distribución normal: DISTR.NORMAL.INV.

## Edad

La media es 70,9 años **y lo de 12,29** se usa la distribución normal. Hay que añadir la función entero porque los ciclos sólo funcionan con números enteros. Se utiliza la distribución normal: DISTR.NORMAL.INV.

## Sexo

Distribución binomial (Bernoulli) a partir del ensayo clínico (221 mujeres y 314 hombres)

Función BINOM:CRITIC

## Peso

Distribución normal a partir de los datos del ensayo clínico. Media 75,9 kg y DE 12,29. Se utiliza la distribución normal: DISTR.NORMAL.INV.

## Paso 2

Definir las fórmulas de los parámetros a partir de las distribuciones. Para ello tenemos que tener claro dónde vamos a colocar las distribuciones y dónde los valores que utilizaremos en cada simulación. Hay diferentes formas de hacerlo.

En una columna introducimos las distribuciones (columna aleatoria). Es la columna que variará cada vez que funcione el generador aleatorio. Al lado de ella tenemos la columna usada, que contendrá los valores de los parámetros utilizados en cada simulación. Las columnas de los valores de las alternativas 1 y 2 se calculan a partir de la columna usada.

Algunos valores son el mismo de la columna usada y otros requieren un cálculo. Lo que se trata ahora es de completar todas las columnas.

### *Paso 3*

Realizar mediante las macros los bucles que permiten calcular el resultado mediante simulaciones de Monte Carlo y almacenarlo.

La fórmula más sencilla es descomponer una macro compleja en macros simples y posteriormente unirlos.

El texto de la macro se muestra a continuación:

```
Sub RealizarSimulaciones()  
'copia el resultado de cada simulacion por debajo de la previa'  
Application.ScreenUpdating = False  
Sheets("Sumario").Select  
NumSimulaciones = Range("I2").Value  
ResetearSumario  
For NumResultado = 1 To NumSimulaciones  
Calculate  
Application.StatusBar = "replicate " & NumResultado  
CopiarParamAleatorio  
AlmacenarSimulacion  
Next  
Application.ScreenUpdating = True  
End Sub
```

En cada simulación, lo que se hace en primer lugar es decir que funcione el generador aleatorio (Calculate). Posteriormente se copian los



parámetros de la columna aleatoria a la columna usada. También se copian los valores de los parámetros de la columna usada a la hoja sumario, pero traspuestos. Esto nos permite a posteriori analizar la distribución real que hemos utilizado con cada parámetro.

El último paso es almacenar el sumario debajo del resultado de la simulación anterior.

Las macros están medidas ya en el fichero. Para verlas se puede entrar en el editor de Visual Basic (ALT+F11)

Para incorporar botones que realicen las macros hay que tener en pantalla el menú de formularios (se incorpora desde Ver, barra de herramientas, formularios). Lo único que hay que hacer es incorporar la macro al botón.

### Resumen de los parámetros del modelo probabilístico

| De          | A           | Probabilidad           |
|-------------|-------------|------------------------|
| Sano        | Sano        | #                      |
| Sano        | Ictus       | 1-EXP(-tasa de ictus)  |
| Sano        | Muerte      | 1-EXP(-tasa de muerte) |
| Dependiente | Dependiente | #                      |
| Dependiente | Muerte      | DISTR.BETA.INV(80;120) |

|                        |                                        |
|------------------------|----------------------------------------|
| RR ictus alternativa 1 | DISTR.LOG.INV(1,793;0,143)             |
| RR ictus alternativa 2 | DISTR.LOG.INV(1,793;0,143) * beneficio |
| Beneficio              | DISTR.LOG.INV(-0,964;0,163)            |

|                     |            |
|---------------------|------------|
| Coste alternativa 1 | 6,5 * peso |
| Coste alternativa 2 | 65 * peso  |

|                           |                                |
|---------------------------|--------------------------------|
| Peso                      | DISTR.NORMAL.INV(75,9;12,29)   |
| Coste dependencia por año | DISTR.LOG.INV(6,936;0,643)     |
| Sexo                      | BINOM:CRITIC(1;221/(221+314))  |
| Edad                      | DISTR.NORMAL.INV(70,9;12,29)   |
| Utilidad dependencia      | DISTR.NORMAL.INV(0,701;0,0347) |

#### Ejercicio 4. Fichero EnfGenericaCEejercicio4.xls

En este ejercicio vamos a obtener los tres resultados a partir de las efectividades y los costes incrementales: plano coste-efectividad, valor esperado de la información perfecta (EVPI) y curva de aceptabilidad.

El plano coste-efectividad se obtiene mediante un gráfico tipo XY (dispersión) en el cual los valores x son la efectividad incremental (Sumario!F11:F1010) y los y el coste incremental (Sumario!E11:E1010) de cada simulación. Además, se pueden introducir como series el umbral de 30.000 €/AVAC y la media o la mediana de las simulaciones. Para introducir el umbral está el rango L2:M3 de la hoja sumario. Es una serie con dos valores, el del umbral y el de 0 para poder unirlos y crear la línea.

Para poder obtener el EVPI tenemos que calcular primero el beneficio neto (BN). La fórmula es:

$$BN = \text{efectividad incremental} \times \text{umbral} - \text{coste incremental}$$

Este cálculo se realiza para cada simulación en la columna E. En la siguiente columna indicamos si el resultado implica coste de oportunidad. Esto sólo ocurre cuando el beneficio neto es negativo. Se introduce la función Si con la condición SI(E4<0;1;0). Esto significa que cuando BN es mayor que 0 no hay coste de oportunidad. En la columna G multiplicamos las columnas E y F.

El EVPI total por persona es la media de la columna G. Si lo multiplicamos por la población afectada obtenemos el EVPI poblacional.

El siguiente paso es calcular el EVPI en función de los diferentes umbrales. El cálculo nos sirve también para calcular la curva de aceptabilidad. Para cada umbral es el número de simulaciones con un valor positivo. Para facilitar esta tarea se ha introducido una macro similar a la del cálculo del análisis de sensibilidad.

La curva de aceptabilidad es un gráfico de líneas en el cual los valores de la serie son el rango EVPI!Q3:Q12 y los rótulos son las etiquetas de los umbrales EVPI!L3:L12. Lo que es importante es tener en cuenta que representa el porcentaje de simulaciones con beneficio neto positivo. En primera instancia podemos pensar que son simulaciones con RCEI menor que el umbral. Esto no es exacto por el problema de las RCEI negativas que pueden estar en el cuadrante SE (dominante) o NO (dominada). Convertir la RCEI en beneficio neto permite solventar este problema.
